# Supplementary material for: Lithic Artifacts Starch Residues from Fenghuangzui Neolithic Site (4400-4200 cal BP) in Central China: Identification and Implications
Source: Research Square preprint supplement (doi:10.21203/rs.3.rs-5741165/v1), 2025-04-10
Supplement: Supplementary file 1 [file 1829ffa44575ac915baba90c.xlsx]

## Sheet: Sheet1
Table 1 Radiocarbon Dating of H13
Laboratory number	Sample	Unit	Radiocarbon Date (BP)	Tree-ring chronology calibration (BP)(95.4%)
Beta-577497	charcoal	H13①	3850±30	4470~4218（75.6%）
				4209~4155（19.8%）
Beta-577498	charcoal	H13①	3880±30	4416~4235（94.1%）
				4196~4185（1.3%）
Beta-577499	charcoal	H13②	3880±30	4416~4235（94.1%）
				4196~4185（1.3%）
Beta-577500	charcoal	H13②	3870±30	4414~4227（89.6%）
				4200~4178（4.4%）
				4169~4160（1.4%）
