# Supplementary material for: Lithic Artifacts Starch Residues from Fenghuangzui Neolithic Site (4400-4200 cal BP) in Central China: Identification and Implications
Source: Research Square preprint supplement (doi:10.21203/rs.3.rs-5741165/v1), 2025-04-10
Supplement: Supplementary file 2 [file 28180492ea66c29b0e6a4078.xlsx]

## Sheet: Sheet1
Table 3 Lithic Samples and Effective Starch granules From Fenghuangzui
Lithic	NO.	Technological Type	Source	Number of Starch granules		Identification results
Lithic artifacts with cutting edges	H13②:56	Core-Tool	Sed 1	14	24	Setaria type, Manihot type, Amorphophallus type and Saururus type
			Sed 2	3
			Sed 3	7
	H13①:3	Core-Tool	Sed 1	6	9
			Sed 2	1
			Sed 3	2
	H13②:6	Fragment Tool	Sed 2	0	1
			Sed 3	1
	H13②:73	Stone Adze	Sed 1	2	5
			Sed 2	1
			Sed 3	2
	H13②:72	Grounding Flake	Sed 2	1	3
			Sed 3	2
	H13②:87	Flake	Sed 1	0	3	No valid starch granules
			Sed 2	3
			Sed 3	0
	H13②:9	Grounding Flake	Sed 2	0	0
			Sed 3	0
	H13①:2	Flake	Sed 2	1	1
Fragments	H13②:65	Fragment	Sed 1	0	3	No valid results
			Sed 2	1
			Sed 3	2
	H13①:8	Small Fragment	Sed 1	1	3
			Sed 2	1
			Sed 3	1
	H13②:82	Fragment	Sed 1	1	4
			Sed 2	2
			Sed 3	1
	H13②:84	Unknown Fragment	Sed 2	1	2
			Sed 3	1
	H13②:57	Unknown Fragment	Sed 1	3	3	No valid starch granules
			Sed 2	0
			Sed 3	0
	H13②:68	Fragment	Sed 1	0	2
			Sed 2	2
			Sed 3	0
	H13②:77	Unknown Fragment	Sed 1	0	2
			Sed 2	2
			Sed 3	0
	H13②:74	Fragment	Sed 1	2	2
			Sed 2	0
			Sed 3	0
	H13②:78	Strip Fragment	Sed 1	0	1
			Sed 2	1
			Sed 3	0
Bipolar products	H13②:18	Bipolar Products	Sed 1	5	8	Castanea type
			Sed 2	2
			Sed 3	1
	H13②:83	Bipolar Products	Sed 1	1	4
			Sed 2	1
			Sed 3	2
	H13②:86	Bipolar Products	Sed 1	2	4
			Sed 2	2
			Sed 3	0
Lithics with unclear technological type	H13②:63	Unknown	Sed 1	11	14	No valid results
			Sed 2	1
			Sed 3	2
Stone Chisel	H13①:19	Stone Chisel	Sed 2	2	2	No valid starch granules
			Sed 3	0
Grinding stone	H13①:5	Grinding Stone Fragment	Sed 1	1	1	No valid starch granules
			Sed 2	0
			Sed 3	0
