# Supplementary material for: Lithic Artifacts Starch Residues from Fenghuangzui Neolithic Site (4400-4200 cal BP) in Central China: Identification and Implications
Source: Research Square preprint supplement (doi:10.21203/rs.3.rs-5741165/v1), 2025-04-10
Supplement: Supplementary file 3 [file 288b576b21a385dca7d6efb1.xlsx]

## Sheet: Sheet1
Table 2 The Sites that Archaeobotanical Remains were Unearthed and Investigated
Site	Location	Archaeological Culture	Type	Reference
Chentoushan	Lixian, Hunan	Shijiahe	Phytoliths, Macro-remains	(Gu, 1996)
Yangzhuang	Zhumadian, Henan	Shijiahe	Phytoliths	(Archaeology Department of Peking University et al., 1998)
Baligang	Dengzhou, Henan	Yangshao,	Macro-remains	(Jiang et al., 1998)
		Shijiahe	Phytoliths	(Deng et al., 2012)
Yejiamiao	Xiaogan, Hubei	Late Qujialing,	Macro-remains	(Wu et al., 2010)
		Early Shijiahe
Qinglongquan	Yunxian, Hubei	Yangshao,	Macro-remains	(Wu, 2011)
		Qujialing,
		Third Qinglongquan
Gouwan	Xichuan, Henan	Yangshao,	Macro-remains	(Wang et al., 2011)
		Shijiahe,
		Qujialing	Starch granules	(Zhao, 2018)
Tanjialing, Sanfangwan	Tianmen, Hubei	Late Shijiahe	Macro-remains	(Deng et al., 2013)
Xiawanggang	Xichuan, Henan	Yangshao,	Macro-remains	(Tang, 2014)
		Qujialing,
		Third Wangsan
Lishangang	Macheng, Hubei	Shijiahe	Macro-remains	(Tang, 2014)
Xiajiangjiabianzi	Yicheng, Hubei	Late Shijiahe	Macro-remains	(Tang, 2014)
Xiezidi	Daye, Hubei	Shijiahe,	Macro-remains	(Tang et al., 2014)
		Late Shijiahe
Dasi	Yunxian, Hubei	Yangshao,	Macro-remains	(Tang et al., 2016)
		Qujialing,
		Late Shijiahe
Chengzishan	Ezhou, Hubei	Shijiahe	Macro-remains	(Tang et al., 2017)
Sunjiagang	Lixian, Hunan	Late Shijiahe	Macro-remains	(Fan et al., 2018)
Mulintou	Baokang, Hubei	Qujialing	Macro-remains	(Tang et al., 2019)
Jijiawan	Fangxian, Hubei	Yangshao,	Macro-remains	(Tian et al., 2019)
		Qujialing
Qujialing	Jingmen, Hubei	Youziling,	Macro-remains	(Yao et al., 2019)
		Qujialing,	Starch granules	(Khan et al.,2022)
		Shijiahe	Phytoliths	(Yang et al., 2020)
Zoumaling	Shishou, Hubei	Qujialing,	Macro-remains	(Tang et al., 2021)
		Shijiahe,
		Meishan
