# Supplementary material for: Lithic Artifacts Starch Residues from Fenghuangzui Neolithic Site (4400-4200 cal BP) in Central China: Identification and Implications
Source: Research Square preprint supplement (doi:10.21203/rs.3.rs-5741165/v1), 2025-04-10
Supplement: Supplementary file 4 [file 85a3d0c8a1c1b474ac47e076.xlsx]

## Sheet: Sheet1
Table 4 Prediction Result in Sed 1 and Sed 3
Sed 1
Plant Type	Count	Model Accuracy (%)
Dioscorea type	1	97.5
Maranta type	11	95
Cicer type	7	90.62
Vicia type	2	90.62
Sed 3
Plant Type	Count	Model Accuracy (%)
Amaranthus (root) type	2	100
Dioscorea type	7	100
Acorus type	2	95
Manihot type	2	94.44
Amorphophallus type	1	92.86
Saururus type	2	92.11
Vigna type	1	90.62
